# Supplementary material
Source: MDPI journal article supplement (https://www.mdpi.com/2075-4701/12/1/79)
Supplement: s1 [file s1]

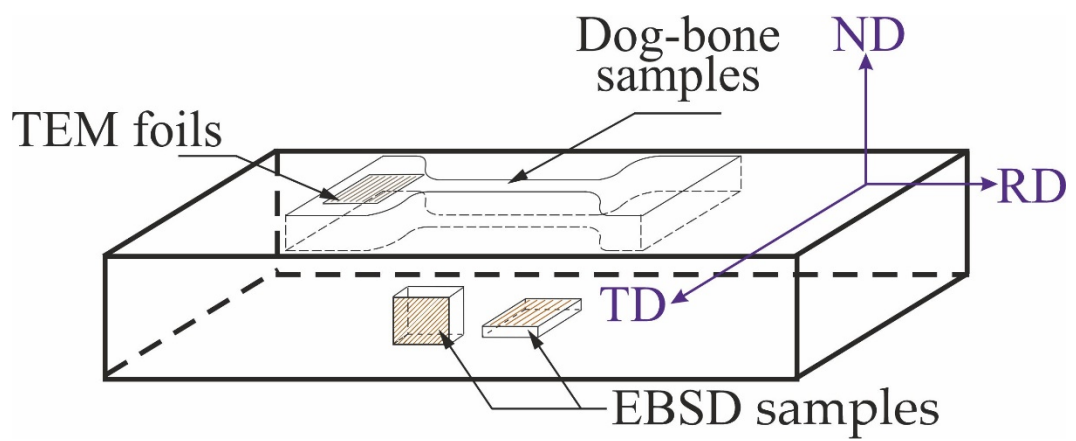

**Figure S1.** The scheme of sample cutting for microstructure observation and tension tests.

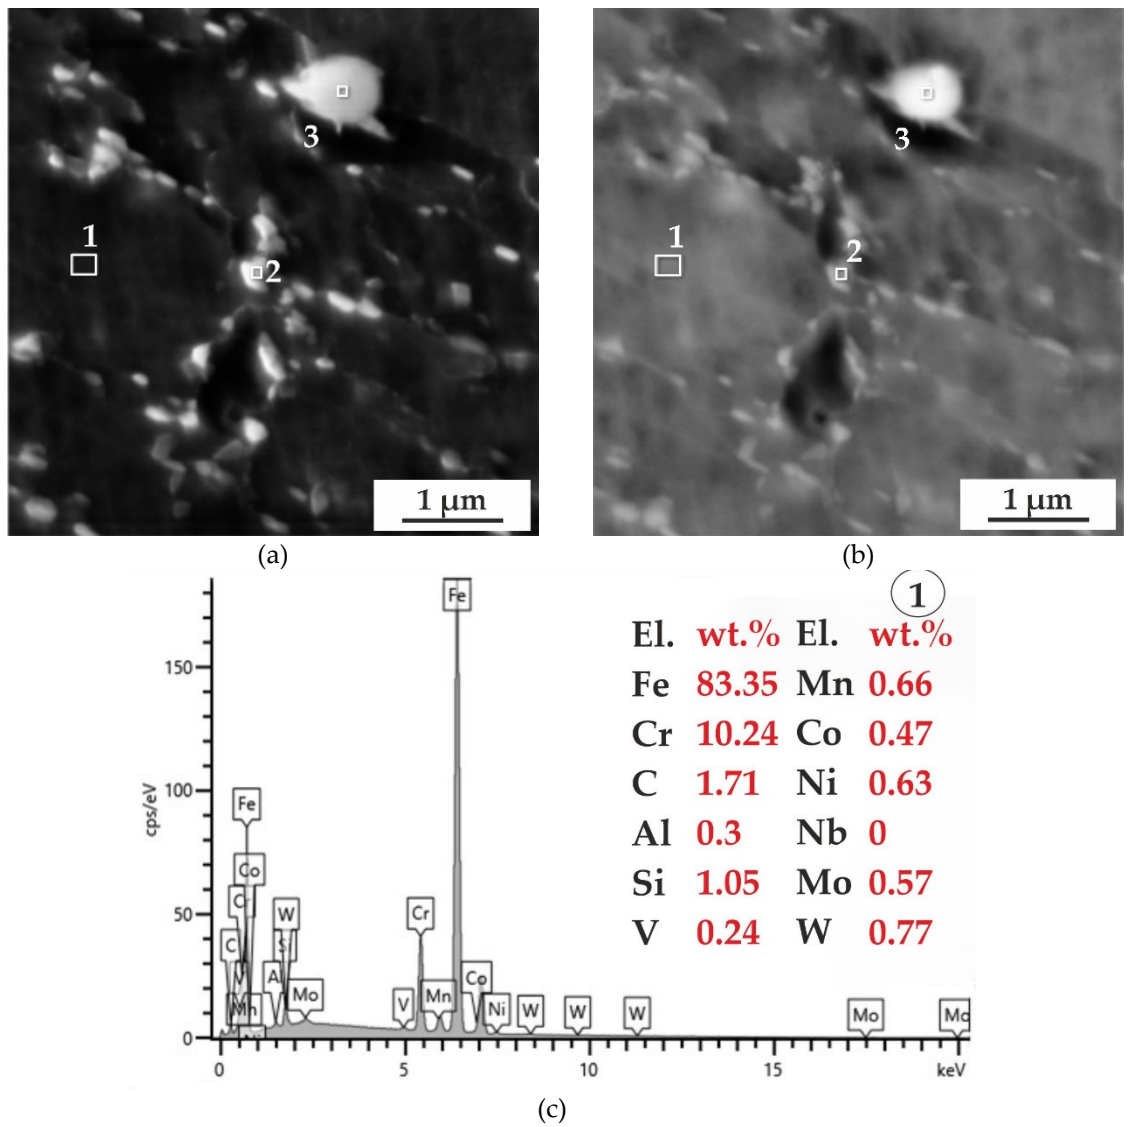

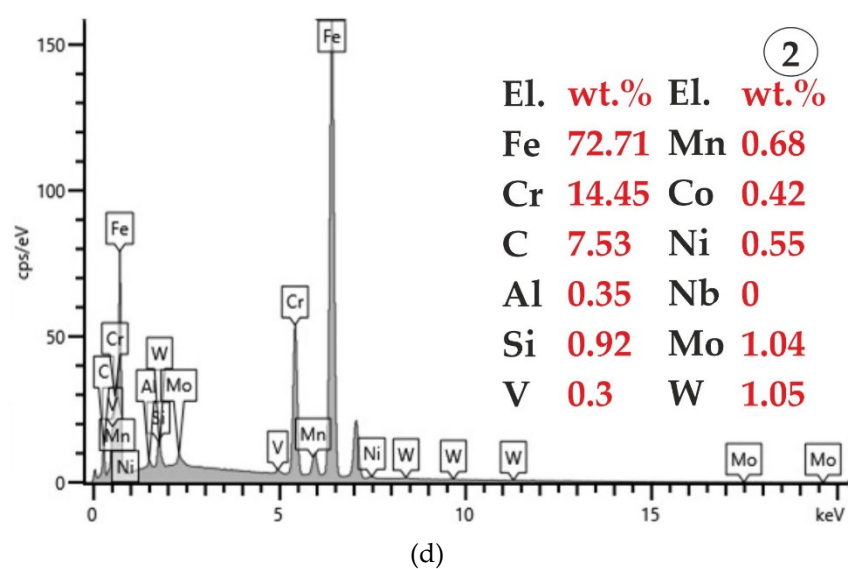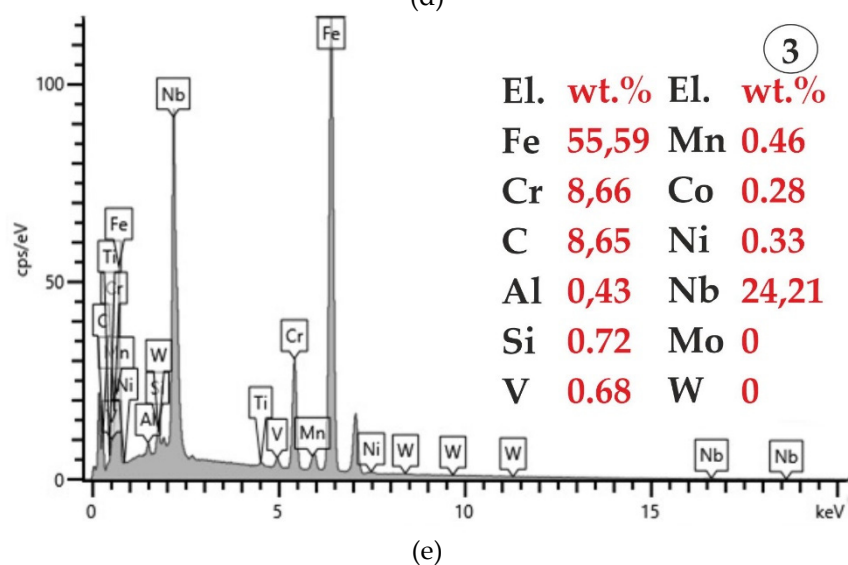

**Figure S2.** SEM images of etched steel microstructure. SE image (a); BSE image (b); local elemental analysis in point 1-3 respectively (c-e).

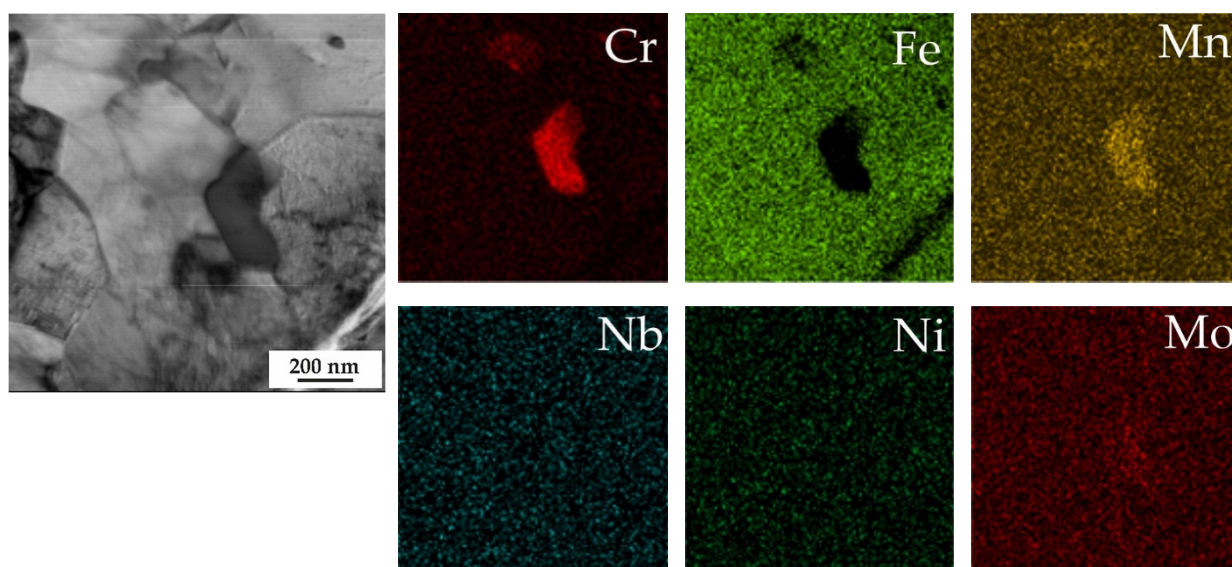

**Figure S3.** STEM image and elemental maps.
